# Supplementary material
Source: MDPI journal article supplement (https://www.mdpi.com/2073-4395/12/10/2289)
Supplement: s1 [file s1]

## Sweet maize

A)

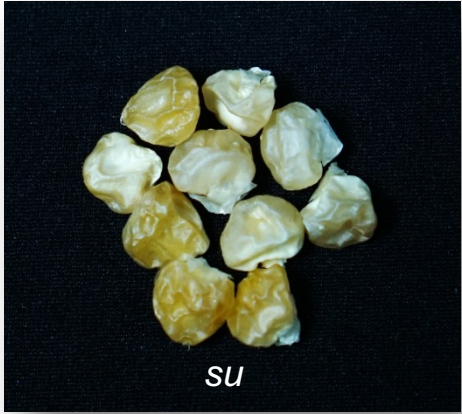

B)

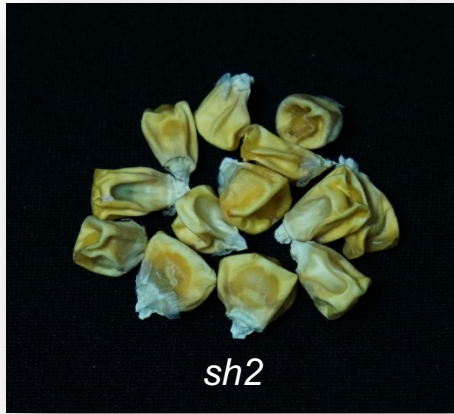

C)

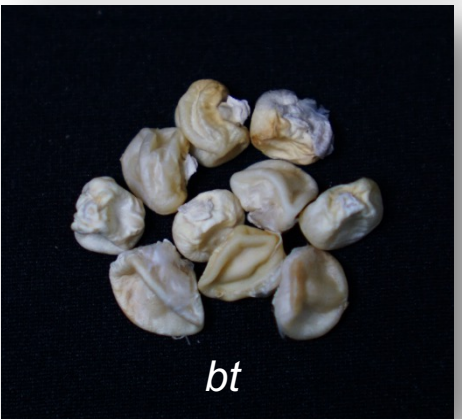

D)

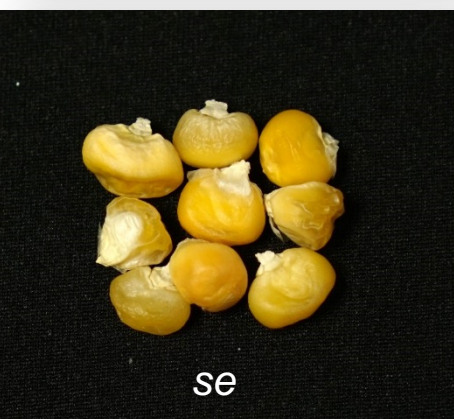

## Waxy maize

E)

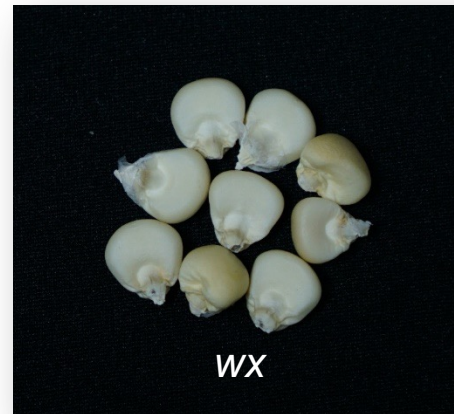

## Field maize

F)

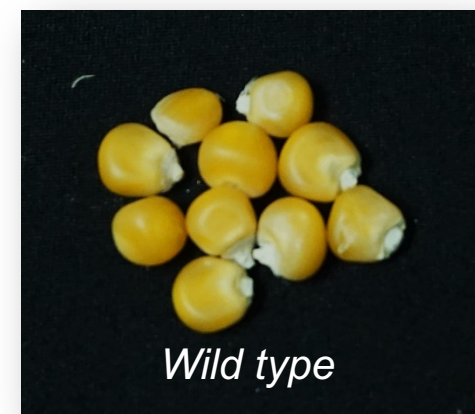

**Figure S1.** The physical appearance of dried kernels of sweet, waxy, and field maizes. (A) - (D) represent sweet maize with the *sh2*, *bt*, *su*, and *se* backgrounds, respectively. (E) and (F) represent waxy maize and field maize (common maize), respectively.
