# Supplementary material
Source: MDPI journal article supplement (https://www.mdpi.com/2073-4395/12/10/2289)

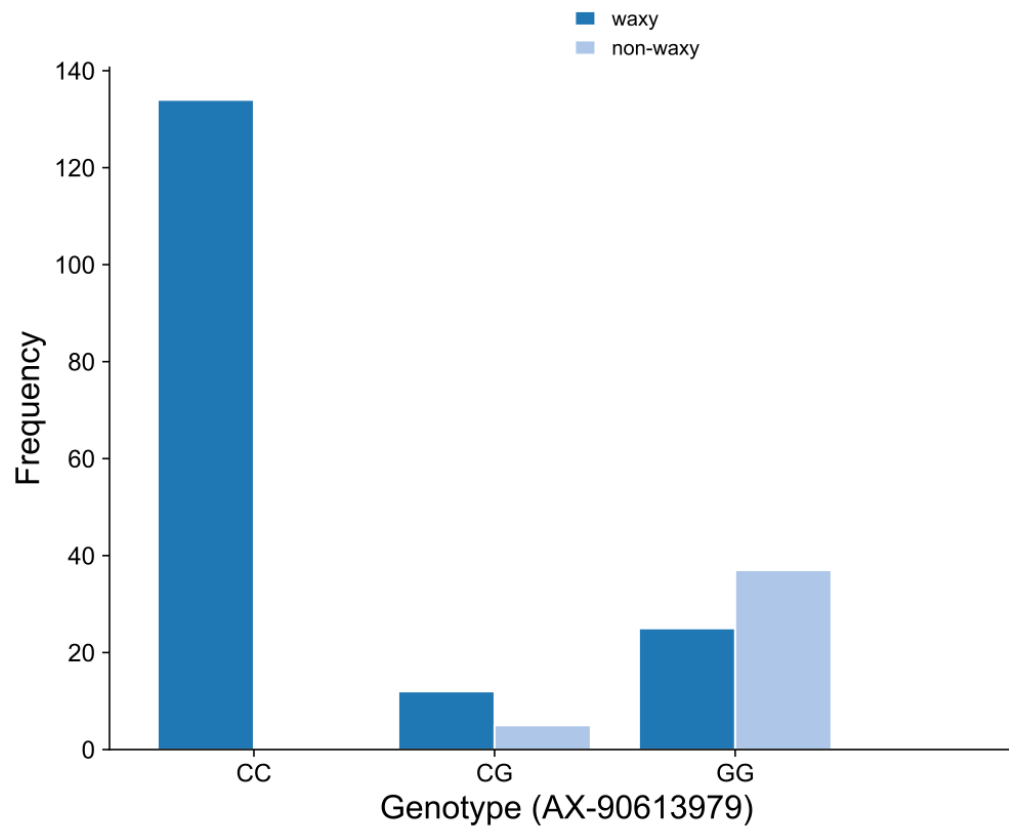

**Figure S3** Frequency of the three genotypes of the SNP AX-90613979 in 213 waxy and non-waxy (field) maize lines.

Supplement: s1 [file s1]

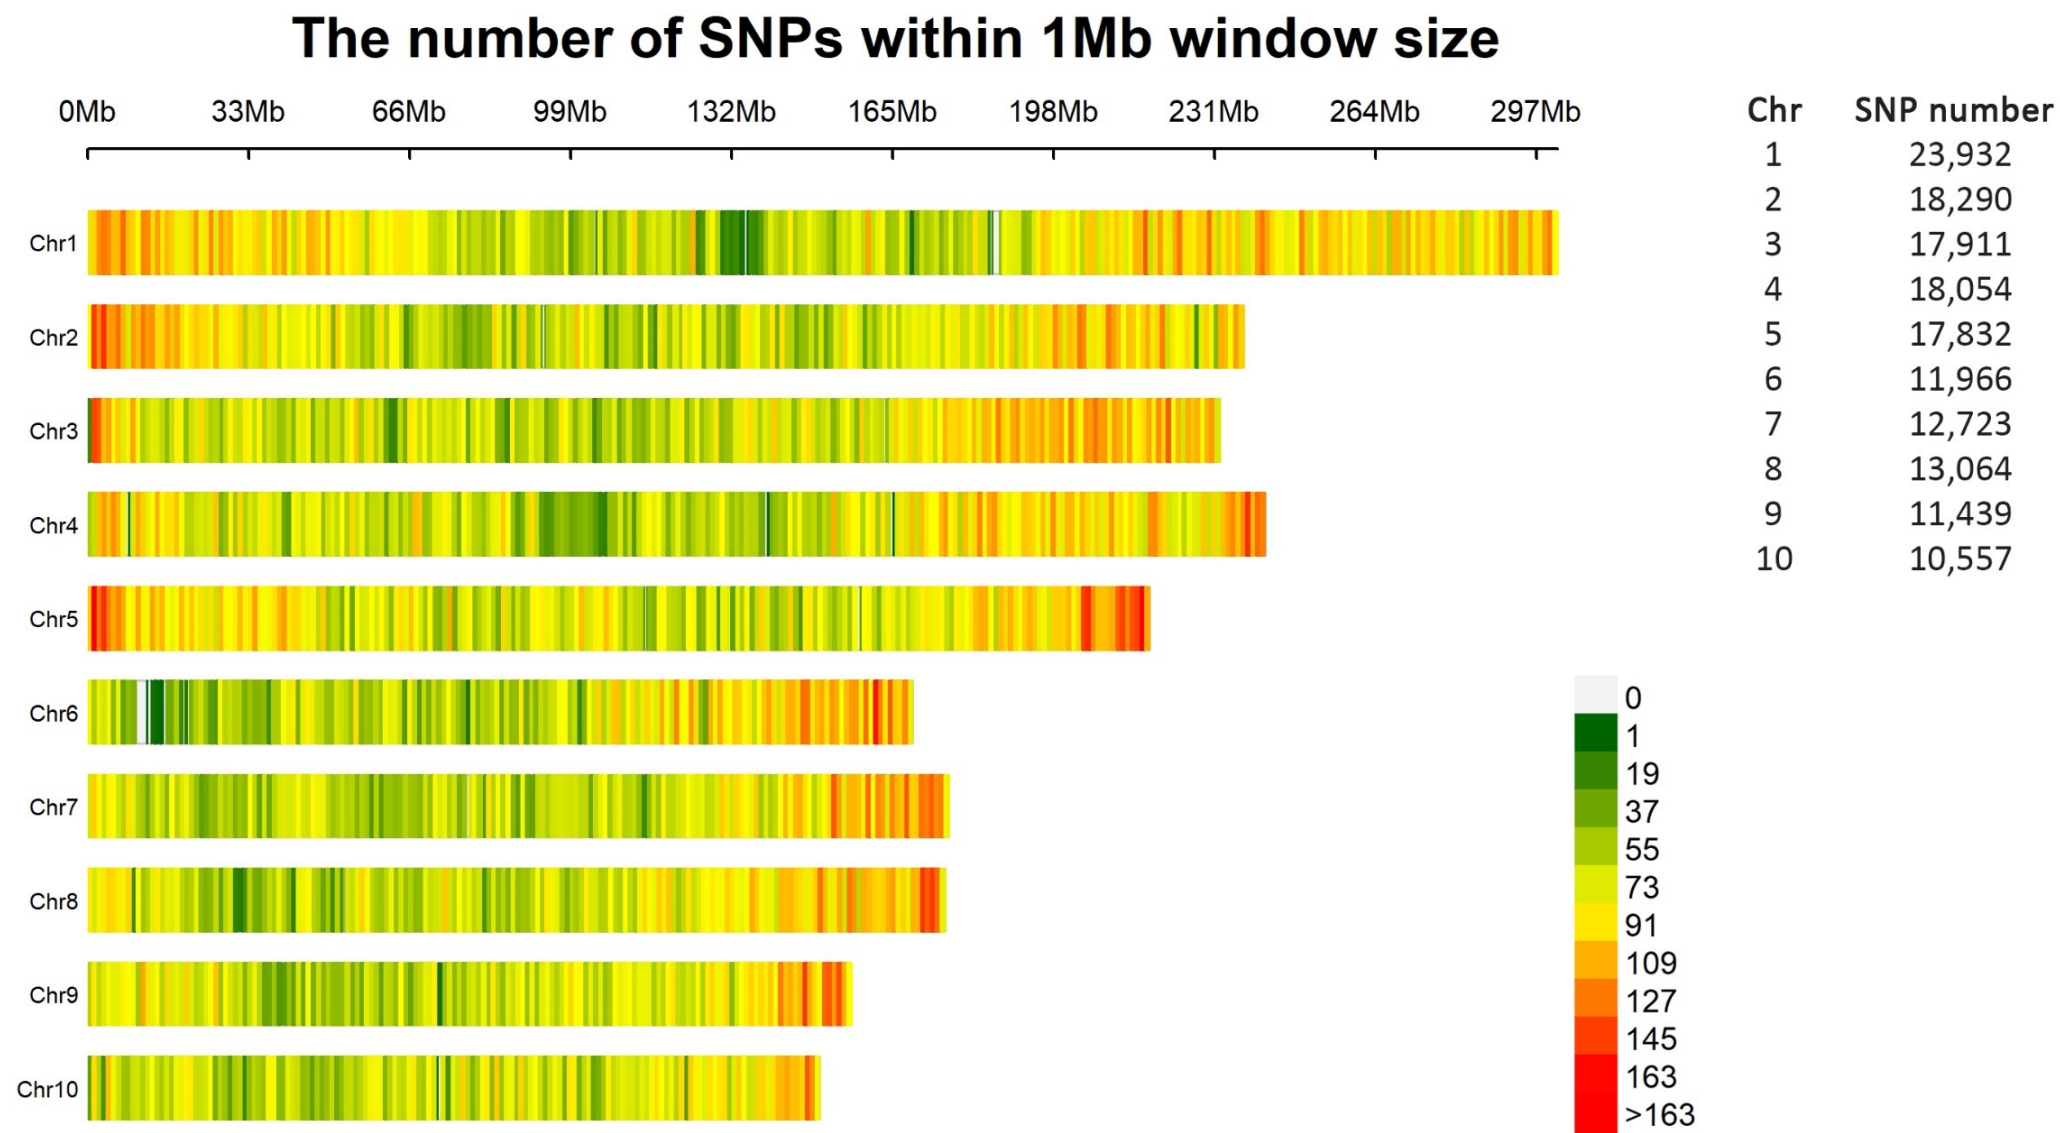

**Figure S2.** Density and distribution of SNPs throughout ten maize chromosomes.

Supplement: s1 [file s1]
